# Supplementary material for: Significant Seasonal Change in Optical Properties by atmospheric humic-like substances (HULIS) in Water-Soluble Organic Carbon Aerosols
Source: Copernicus journal article supplement (doi:10.5194/acp-2017-554), 2017-07-05
Supplement: Supplementary file 1 [file acp-2017-554-supplement.pdf]

**Supplementary information**

**Significant Seasonal Change in Optical Properties by atmospheric humic-like substances (HULIS) in Water-Soluble Organic Carbon Aerosols**

Heejun Han<sup>1</sup>, Guebuem Kim<sup>1</sup>

<sup>1</sup>School of Earth and Environmental Sciences/RIO, Seoul National University, Seoul 08826, Korea

*Correspondence to:* Guebuem Kim (gkim@snu.ac.kr)

## List of Figures

**Figure S1.** Map of the geographical region around the study site. Correlations between total PM concentration of the study site ( $PM_T$ ) and  $PM_{10}$  concentrations of each region in Korea from March 2015 to January 2016.

**Figure S2.** Contour plots of fluorescence EEM spectra and excitation-emission loadings of (a) humic-like (C1), (b) protein-like (tryptophan) (C2), and (c) terrestrial humic-like (C3) components identified by PARAFAC model for the aerosol WSOM samples collected from March 2015 to January 2016 in Seoul.

**Figure S3.** Correlations between fluorescence intensity of (a) component 1 (C1; HULIS) and component 2 (C2), and between (b) C1 and component 3 (C3).

**Figure S4.** Temporal variations of (a)  $SO_4^{2-}$ , (b)  $Ca^{2+}$ , (c)  $K^+$ , and (d)  $NO_x$  in the aerosol samples collected from March 2015 to January 2016 in Seoul.

**Figure S5.** Temporal variations of ratio of (a)  $K^+$  to  $Ca^{2+}$  and (b)  $K^+$  to  $SO_4^{2-}$  in the aerosol samples collected from March 2015 to January 2016 in Seoul.

**Figure S6.** Seasonal-averaged variations of fluorescence intensity of HULIS (C1), WSOC concentration, and UV radiation rate from cold (Oct–Jan) to transition (Mar–May and Sep–Oct), and to warm season (Jun–Sep) in Seoul.

**Figure S7.** Contour plots of fluorescence EEM spectra of non-irradiated initial samples collected during the (a) winter (Dec/30/15) and (b) summer (Aug/14/15), and UV irradiated (6 weeks) samples collected during the (c) winter (Dec/30/15) and (d) summer (Aug/14/15).

**Figure S8.** Absorbance spectra of the aerosol sample solutions collected during the (a) winter (Dec/30/15) and (b) summer (Aug/14/15), and relationship between fluorescence intensity of HULIS with (c) typical absorption spectrum ( $\lambda$ ) at 240 nm,  $a(240)$ , and (d) at 350 nm,  $a(350)$ .

## List of Tables

**Table 1.** Spectral characteristics of the fluorescence components identified by PARAFAC model for the aerosol samples.

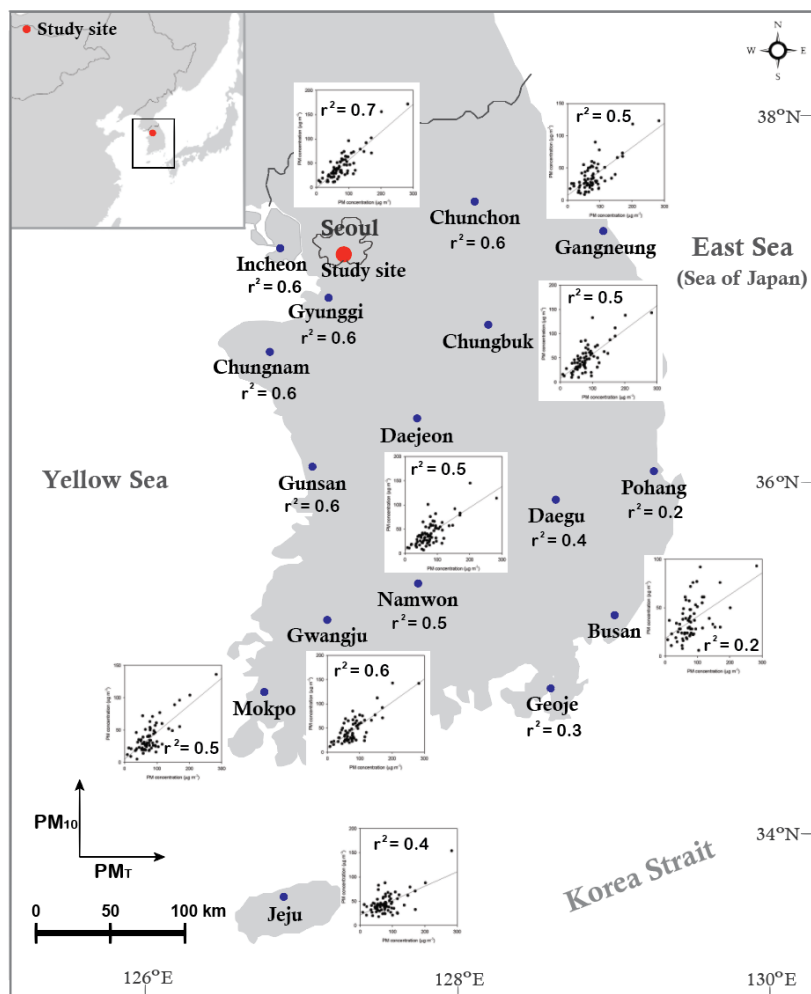

Figure 1: Map of the geographical region around the study site. Correlations between total PM concentration of the study site (PM<sub>T</sub>) and PM<sub>10</sub> concentrations of each region in Korea from March 2015 to January 2016.

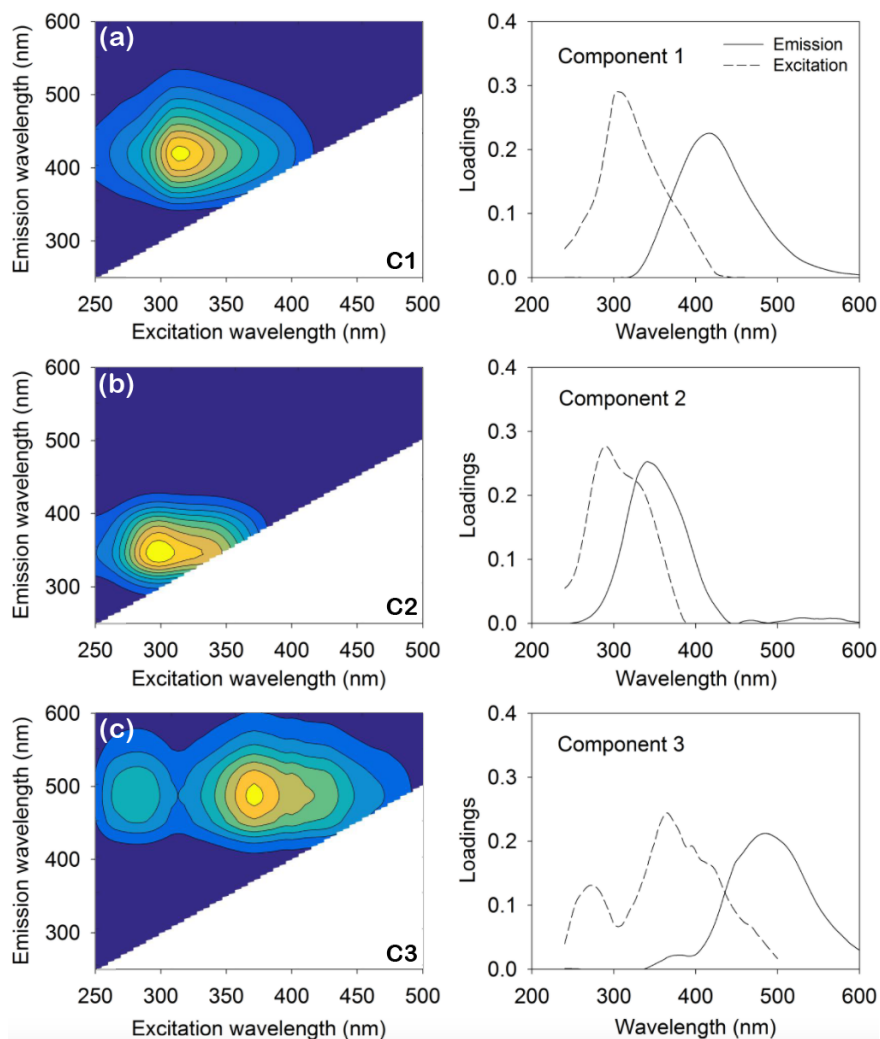

**Figure 2: Contour plots of fluorescence EEM spectra and excitation-emission loadings of (a) humic-like (C1), (b) protein-like (tryptophan) (C2), and (c) terrestrial humic-like (C3) components identified by PARAFAC model for the aerosol WSOM samples collected from March 2015 to January 2016 in Seoul.**

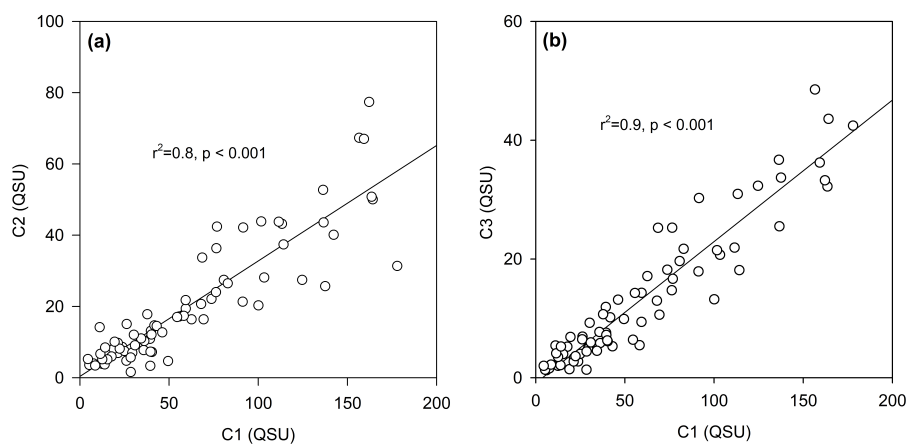

**Figure S3: Correlations between fluorescence intensity of (a) component 1 (C1; HULIS) and component 2 (C2), and between (b) C1 and component 3 (C3).**

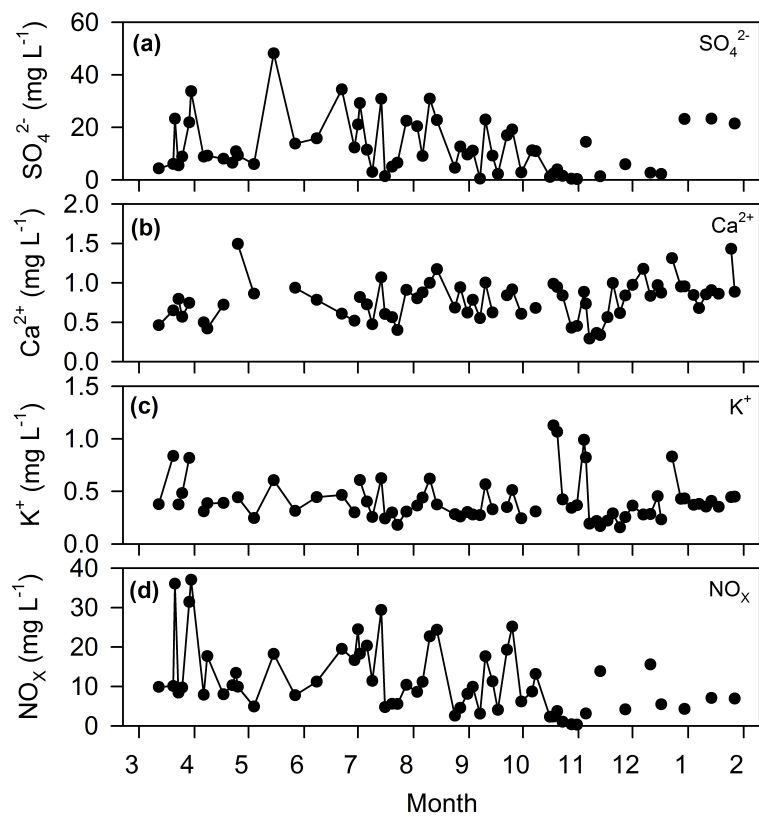

Figure S4: Temporal variations of (a)  $\text{SO}_4^{2-}$ , (b)  $\text{Ca}^{2+}$ , (c)  $\text{K}^+$ , and (d)  $\text{NO}_x$  in the aerosol samples collected from March 2015 to January 2016 in Seoul.

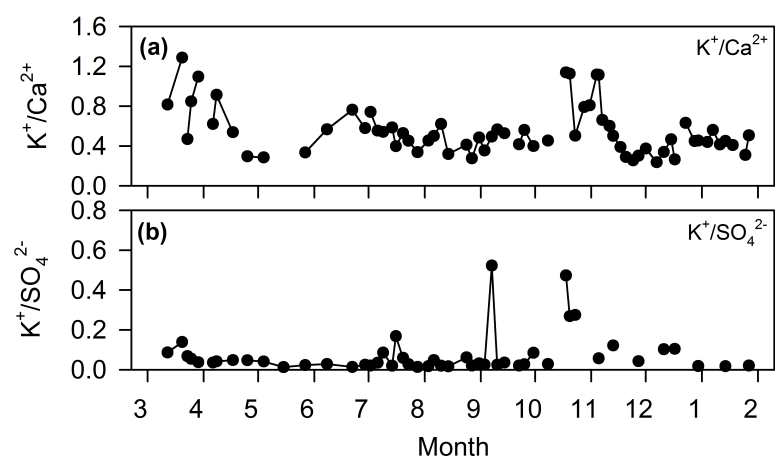

Figure S5: Temporal variations of ratio of (a)  $K^+$  to  $Ca^{2+}$  and (b)  $K^+$  to  $SO_4^{2-}$  in the aerosol samples collected from March 2015 to January 2016 in Seoul.

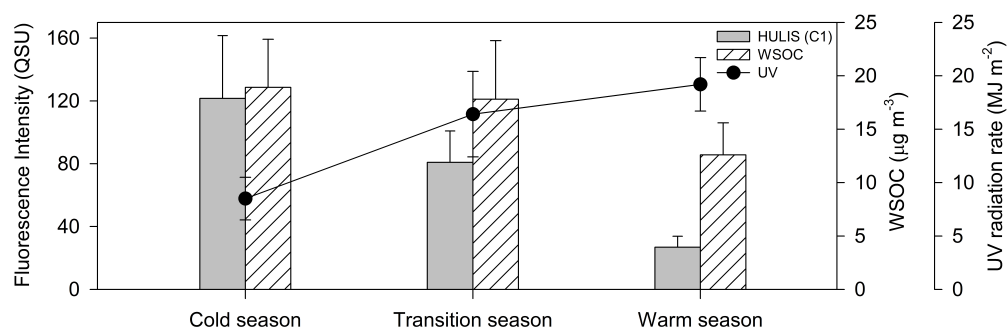

**Figure S6: Seasonal-averaged variations of fluorescence intensity of HULIS (C1), WSOC concentration, and UV radiation rate from cold (Oct–Jan) to transition (Mar–May and Sep–Oct), and to warm season (Jun–Sep) in Seoul.**



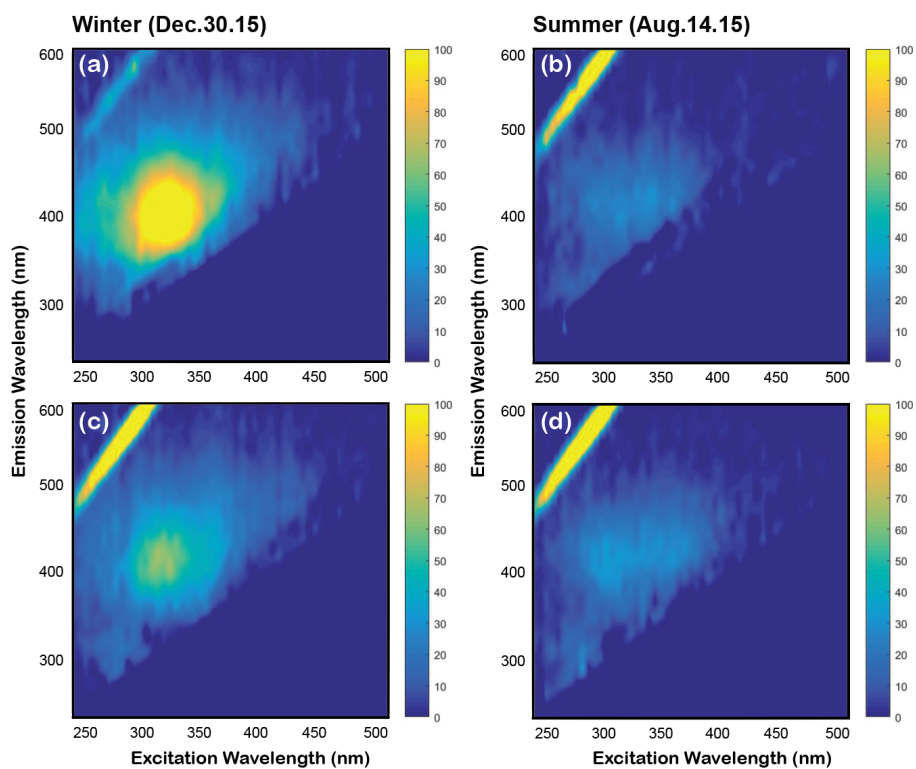

**Figure S7: Contour plots of fluorescence EEM spectra of non-irradiated initial samples collected during the (a) winter (Dec/30/15) and (b) summer (Aug/14/15), and UV irradiated (6 weeks) samples collected during the (c) winter (Dec/30/15) and (d) summer (Aug/14/15).**

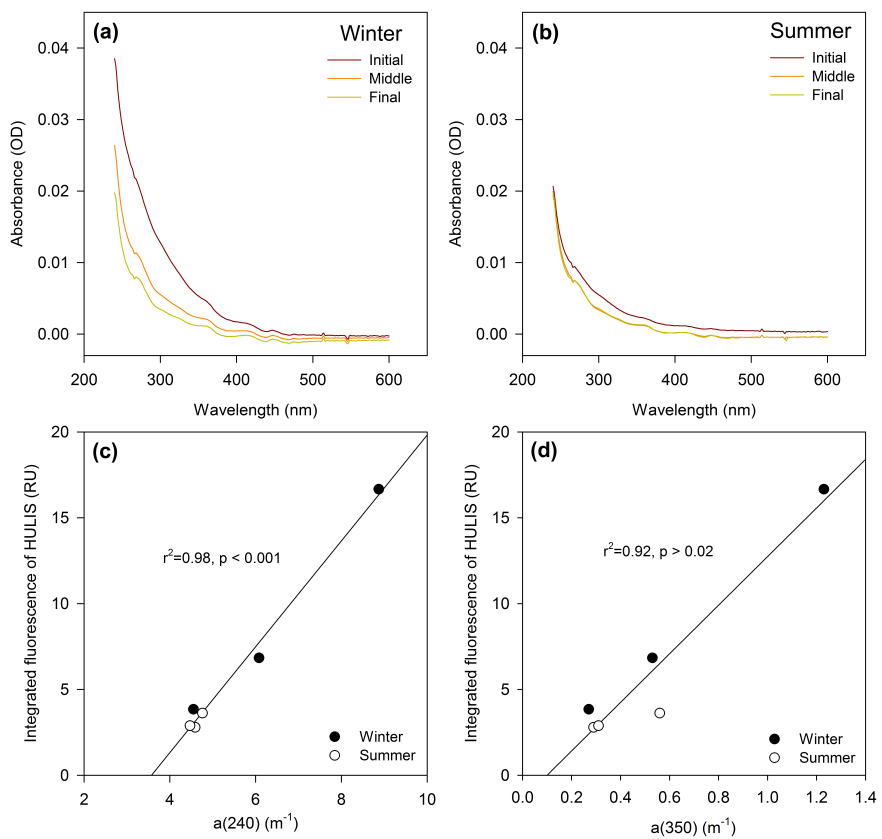

**Figure S8: Absorbance spectra of the aerosol sample solutions collected during the (a) winter (Dec/30/15) and (b) summer (Aug/14/15), and relationship between fluorescence intensity of HULIS with (c) typical absorption spectrum ( $\lambda$ ) at 240 nm,  $a(240)$ , and (d) at 350 nm,  $a(350)$ .**

**Table 1: Spectral characteristics of the fluorescence components identified by PARAFAC model for the aerosol samples.**

| <b>Component</b> | <b>Ex/Em wavelengths [nm]</b> | <b>Peak</b> | <b>Description and origin</b>                                                                                                    |
|------------------|-------------------------------|-------------|----------------------------------------------------------------------------------------------------------------------------------|
| C1               | 305/416                       | M           | Terrestrial humic-like component (Stedmon and Markager, 2005);<br>HULIS (Pöhlker et al., 2012)                                   |
| C2               | 290/340                       | T           | Protein-like (tryptophan-like) component derived from autochthonous processes (Stedmon and Markager, 2005; Pöhlker et al., 2012) |
| C3               | 365/484                       | C           | Terrestrial humic-like component (Stedmon and Markager, 2005)                                                                    |
